# Supplementary material for: Quantifying the impact of disorder on Li-ion and Na-ion transport in perovskite titanate solid electrolytes for solid-state batteries
Source: Royal Society of Chemistry journal article supplement (doi:10.1039/d0ta05343k), 2020-01-01
Supplement: d0ta05343k1.pdf [file d0ta05343k1.pdf]

## Quantifying the Impact of Disorder on Li-Ion and Na-Ion Transport in Perovskite Titanate Solid Electrolytes for Solid-State Batteries

Adam R. Symington,<sup>\*,a</sup> John Purton<sup>b</sup>, Joel Statham<sup>a</sup>, Marco Molinari<sup>\*,c</sup> Saiful M. Islam<sup>a</sup>, and Stephen C. Parker<sup>a</sup>

<sup>a</sup> Department of Chemistry, University of Bath, Claverton Down, Bath, BA2 7AY, UK

<sup>b</sup> Department of Chemistry, University of Huddersfield, Queensgate, Huddersfield, HD1 3DH, UK

<sup>c</sup> Science and Technologies Facilities Council, Daresbury Laboratory, Keckwick Lane, Daresbury, United Kingdom

KEYWORDS (Solid electrolytes, Perovskites, Ionic conductivity, Materials, Disorder).

### SI 1 – Potential Model

The potential model of Pedone et al., was used for all calculations<sup>1</sup>, and full details are in the SI. The short-range forces are accounted for by interatomic potentials (Morse / Lennard-Jones type) and the long-range ionic interactions treated using Coulombic terms according to

$$U(r) = \frac{z_i z_j e^2}{r} + D_{ij} \left[ \left\{ 1 - e^{-a_{ij}(r-r_0)} \right\}^2 - 1 \right] + \frac{C_{ij}}{r^{12}} \quad (3)$$

where  $z_i z_j$  are the charges on atoms  $i$  and  $j$ ,  $D_{ij}$  is the depth of the potential energy well,  $a_{ij}$  is the a function of the slope of the potential energy well,  $r$  is the distance of separation,  $r_0$  is the equilibrium distance between species  $i$  and  $j$ , and  $C_{ij}$  relates to the potential energy well and describes the repulsion at very short distances between species  $i$  and  $j$ . The parameters for each interaction are listed in Table S1.

**Table S1 - Potential model parameters**

| Ion Pair                              | $D_{ij}$ (eV) | $A_{ij}$ (Å <sup>-2</sup> ) | $R_0$ (Å) | $C_{ij}$ (eV Å <sup>12</sup> ) |
|---------------------------------------|---------------|-----------------------------|-----------|--------------------------------|
| Li <sup>0.6</sup> – O <sup>-1.2</sup> | 0.00111400    | 3.429506                    | 2.681360  | 1.0                            |
| Na <sup>0.6</sup> – O <sup>-1.2</sup> | 0.02336300    | 1.763867                    | 3.006315  | 5.0                            |
| La <sup>1.8</sup> – O <sup>-1.2</sup> | 0.00016219    | 2.023100                    | 4.400680  | 3.0                            |
| Ti <sup>2.4</sup> – O <sup>-1.2</sup> | 0.02423500    | 2.254703                    | 2.708943  | 1.0                            |
| O <sup>-1.2</sup> – O <sup>-1.2</sup> | 0.04239500    | 1.379316                    | 3.618701  | 22.0                           |

## SI 2 – Simulation Cells

Table S2 – Total number of atoms in each simulation cell.

| Composition                                    | Ti  | O    | La  | Li  | Na  | Vacancies |
|------------------------------------------------|-----|------|-----|-----|-----|-----------|
| $\text{Li}_{0.46}\text{La}_{0.51}\text{TiO}_3$ | 768 | 2304 | 394 | 354 | N/A | 20        |
| $\text{Li}_{0.42}\text{La}_{0.53}\text{TiO}_3$ | 768 | 2304 | 404 | 324 | N/A | 40        |
| $\text{Li}_{0.38}\text{La}_{0.54}\text{TiO}_3$ | 768 | 2304 | 414 | 294 | N/A | 60        |
| $\text{Li}_{0.34}\text{La}_{0.55}\text{TiO}_3$ | 768 | 2304 | 424 | 264 | N/A | 80        |
| $\text{Na}_{0.10}\text{La}_{0.63}\text{TiO}_3$ | 768 | 2304 | 394 | N/A | 354 | 20        |
| $\text{Na}_{0.27}\text{La}_{0.59}\text{TiO}_3$ | 768 | 2304 | 404 | N/A | 324 | 40        |
| $\text{Na}_{0.24}\text{La}_{0.58}\text{TiO}_3$ | 768 | 2304 | 414 | N/A | 294 | 60        |
| $\text{Na}_{0.34}\text{La}_{0.56}\text{TiO}_3$ | 768 | 2304 | 424 | N/A | 264 | 80        |

SI 3 – Volume change with increasing disorder

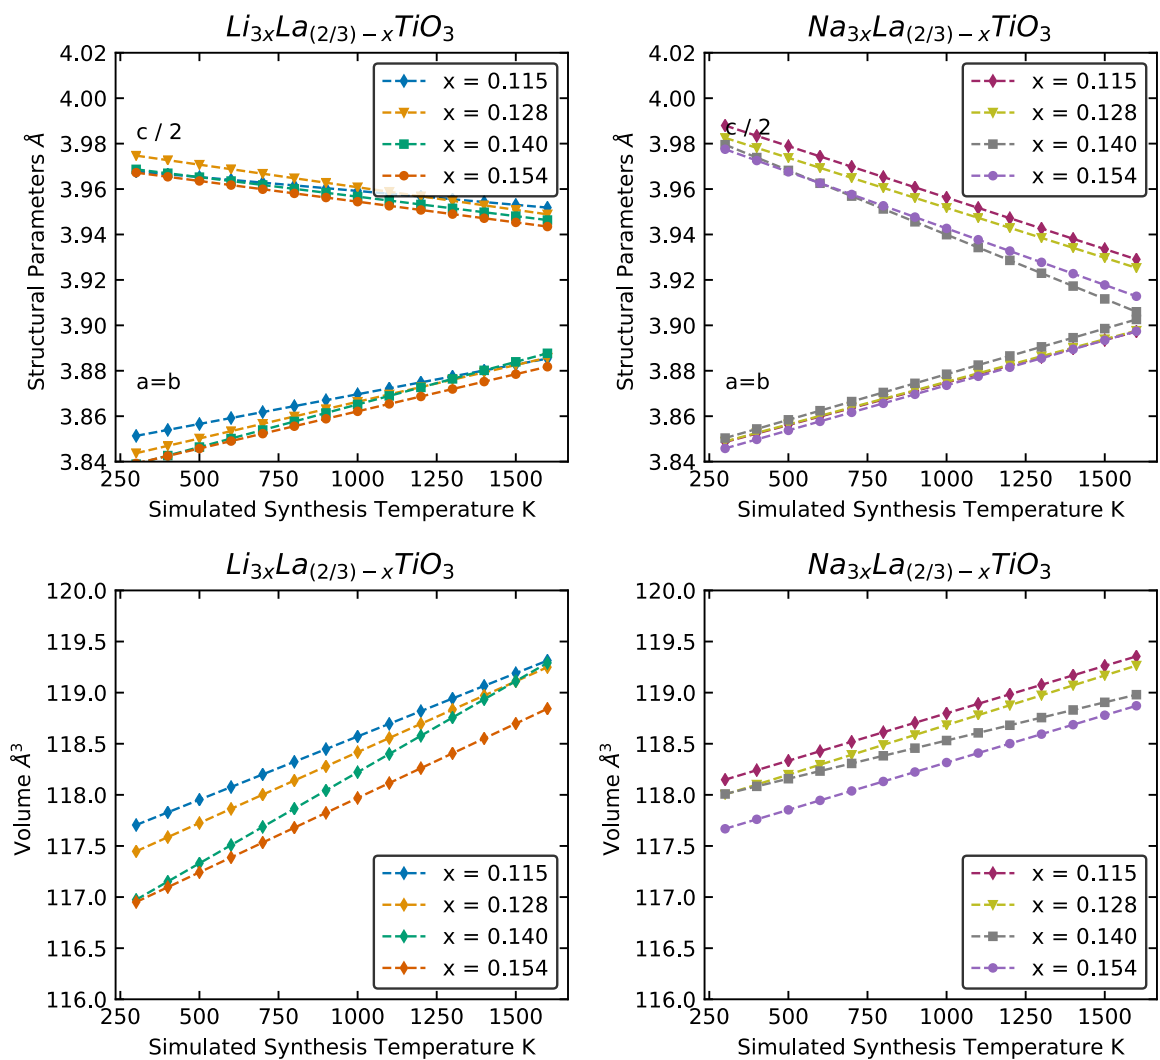

Figure S1 – Calculated volume as a function of temperature for LLTO (A) and NLTO (B) obtained from Monte Carlo. Calculated lattice parameters as a function of temperature for LLTO (C) and NLTO (D) obtained from Monte Carlo.

### SI 4 – Lithium Vacancy Distribution

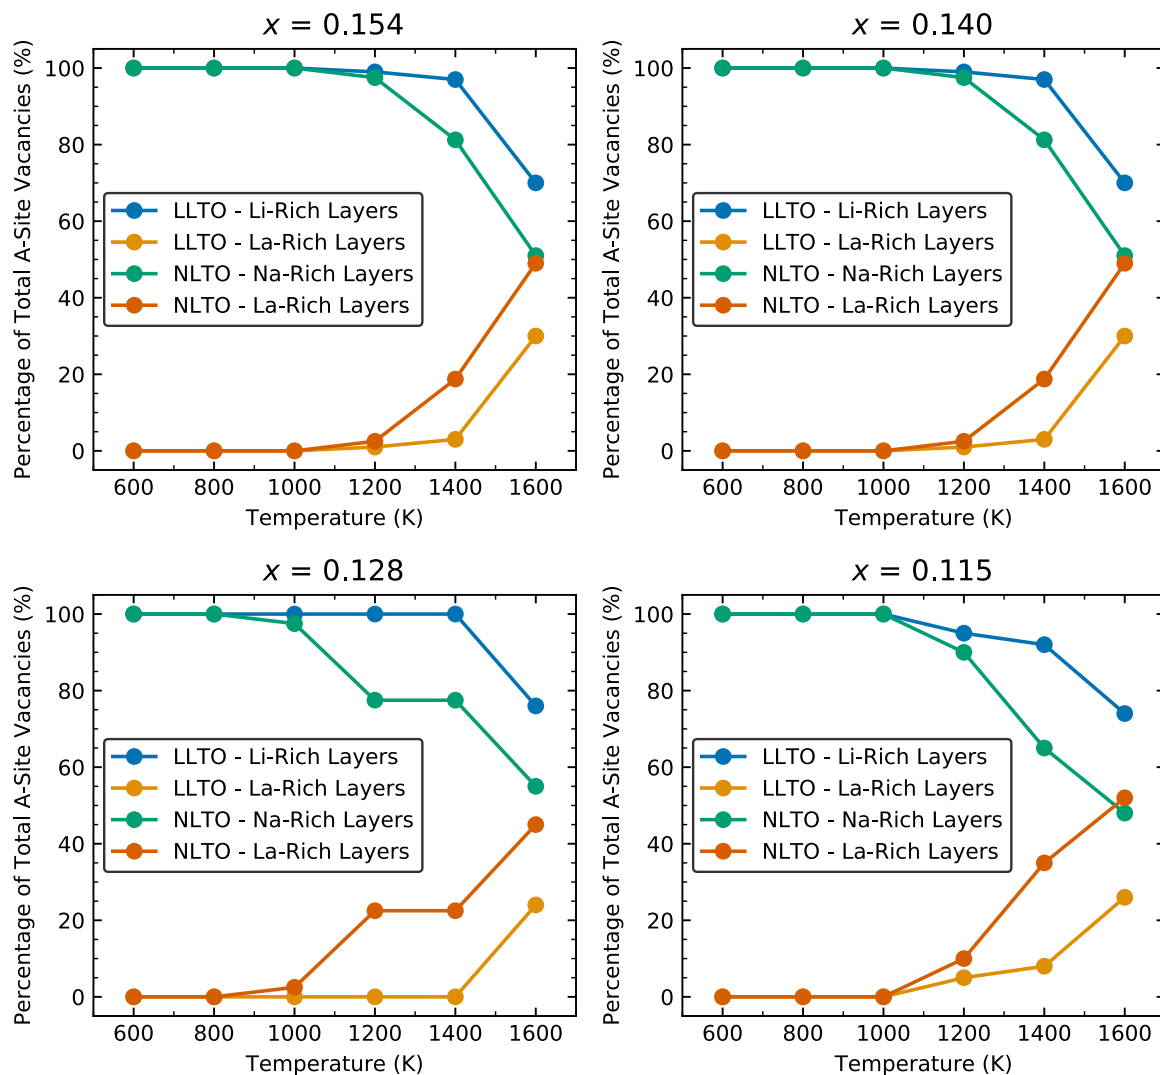

Figure S2 – Percentage of the total number of A-site vacancies in the Li/Na-rich layers for the  $x=0.115$  system. A value of 50% indicates that half of the total A-site vacancies are in the Li/Na-rich layers and half are in the La-rich layers.

### SI 5 – LLTO RDF and Average Bond length

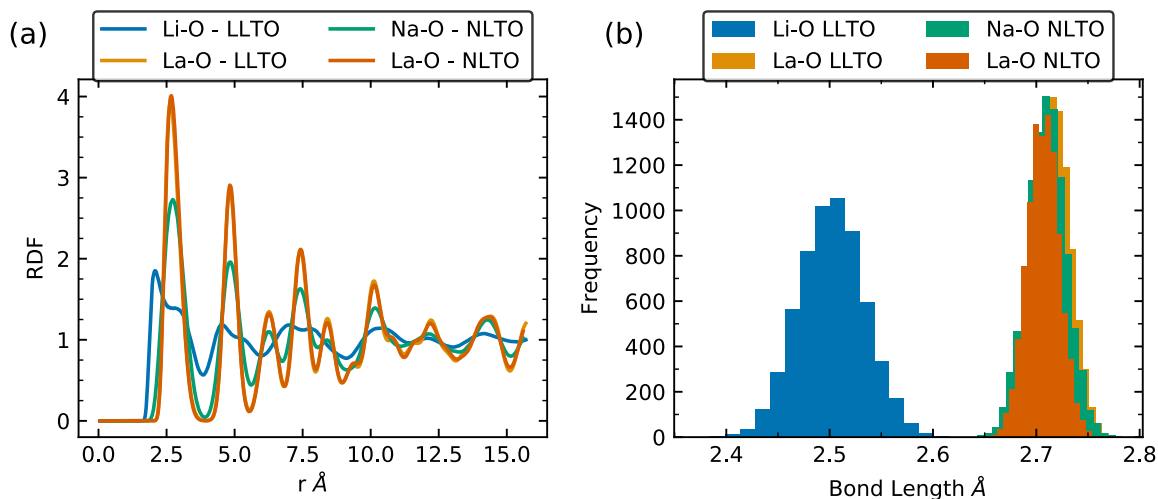

Figure S3– **(a)** Radial distribution function of Li-O (blue) and La-O (orange) in  $x = 0.115$  LLTO and Na-O (green) and La-O (red) in  $x = 0.115$  NLTO at 1600 K. **(b)** Histogram showing the distribution of Li-O (blue) and La-O (orange) bond lengths in  $x = 0.115$  LLTO and Na-O (green) and La-O (red) bond lengths in  $x = 0.115$  NLTO at 1600 K.

### SI 6 – LLTO Mean Squared Displacement

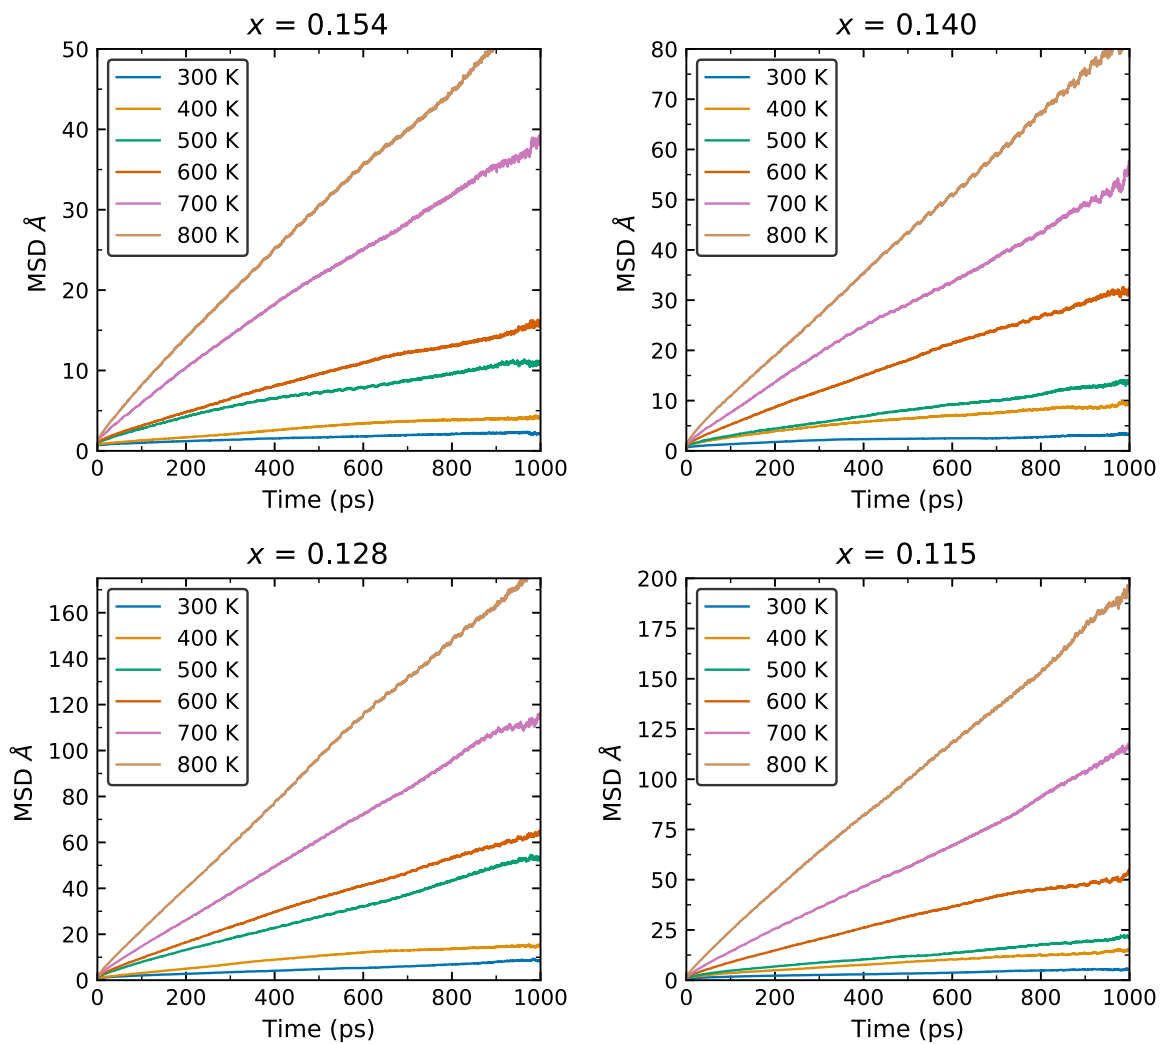

Figure S4 – MSD plots for each LLTO system at within a temperature range of 300 – 800 K.

## SI 7 – Order Parameter

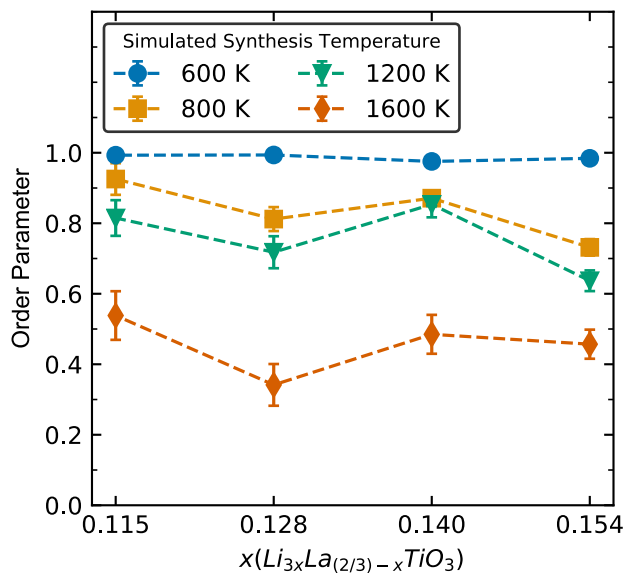

Figure S5 – Order parameter for the  $x = 0.115, 0.128, 0.140$  and  $0.154$  LLTO configurations for simulated synthesis temperatures of 400 K (blue), 800 K (orange), 1200 K (green) and 1600 K (red).

## SI 8 – Comparison of conductivity and activation energy with other work.

| Composition                                    | $\sigma_{Bulk}(S\text{cm}^{-1})$ | $E_a(\text{eV})$ | Reference |
|------------------------------------------------|----------------------------------|------------------|-----------|
| $\text{Li}_{0.46}\text{La}_{0.51}\text{TiO}_3$ | $6.2 \times 10^{-5}$             | 0.19             | This work |
| $\text{Li}_{0.42}\text{La}_{0.53}\text{TiO}_3$ | $4.2 \times 10^{-4}$             | 0.21             | This work |
| $\text{Li}_{0.38}\text{La}_{0.54}\text{TiO}_3$ | $6.1 \times 10^{-4}$             | 0.19             | This work |
| $\text{Li}_{0.34}\text{La}_{0.55}\text{TiO}_3$ | $1.0 \times 10^{-3}$             | 0.23             | This work |
| $\text{Li}_{0.10}\text{La}_{0.63}\text{TiO}_3$ | $7.9 \times 10^{-5}$             | 0.36             | 2         |
| $\text{Li}_{0.27}\text{La}_{0.59}\text{TiO}_3$ | $6.8 \times 10^{-4}$             | 0.36             | 3         |
| $\text{Li}_{0.24}\text{La}_{0.58}\text{TiO}_3$ | $3.9 \times 10^{-4}$             | 0.37             | 4         |
| $\text{Li}_{0.34}\text{La}_{0.56}\text{TiO}_3$ | $6.9 \times 10^{-4}$             | 0.35             | 5         |

## **References**

1. A. Pedone, G. Malavasi, M. C. Menziani, A. N. Cormack and U. Segre, *The Journal of Physical Chemistry B*, 2006, **110**, 11780-11795.
2. Y. Inaguma, L. Chen, M. Itoh and T. Nakamura, *Solid State Ionics*, 1994, **70-71**, 196-202.
3. T. Katsumata, Y. Matsui, Y. Inaguma and M. Itoh, *Solid State Ionics*, 1996, **86-88**, 165-169.
4. J. Emery, J. Y. Buzare, O. Bohnke and J. L. Fourquet, *Solid State Ionics*, 1997, **99**, 41-51.
- 5 Y. Harada, T. Ishigaki, H. Kawai and J. Kuwano, *Solid State Ionics*, 1998, **108**, 407-413.
6. Y. Inaguma, C. Liqun, M. Itoh, T. Nakamura, T. Uchida, H. Ikuta and M. Wakihara, *Solid State Communications*, 1993, **86**, 689-693.
